# Supplementary material for: Preparation and application synthesis of magnetic nanocomposite using waste toner for the removal of Cr(vi)
Source: Royal Society of Chemistry journal article supplement (doi:10.1039/c8ra05291c), 2018-01-01
Supplement: c8ra05291c1.pdf [file c8ra05291c1.pdf]

## Support information

### Preparation and Application of Magnetic Nanocomposite by Waste Toner for Cr(VI) Removal

Hong Zhu<sup>a</sup>, Yucheng Zhou<sup>a</sup>, Shengsen Wang<sup>a,b</sup>, Xiaoge Wu<sup>a</sup>, Jianhua Hou<sup>a,b</sup>, Weiqin Yin<sup>a</sup>, Ke Feng<sup>a,b</sup>, Xiaozhi Wang<sup>a,b,c\*</sup>, Jie Yang<sup>d</sup>

<sup>a</sup> College of Environmental Science and Engineering, Yangzhou University, Jiangsu 225127, China.

<sup>b</sup> Jiangsu Collaborative Innovation Center for Solid Organic Waste Resource Utilization, Nanjing 210095, China.

<sup>c</sup> Institutes of Agricultural Science and Technology Development, Yangzhou University, Yangzhou 225127, Jiangsu, China.

<sup>d</sup> Key Laboratory of Crop and Livestock Integration, Ministry of Agriculture, Nanjing 210095, China.

\*Corresponding author: Tel: +86 514 87979570; Fax: +86 514 87979528;

E-mail address: xzawang@yzu.edu.cn.

Table S1. Surface area, pore size and pore volume of WT(Air), WT(Vac) and WT (NH<sub>3</sub>)

| Sample               | S <sub>BET</sub> (m <sup>2</sup> g <sup>-1</sup> ) | Pore size(nm) | Pore volume(cm <sup>3</sup> g <sup>-1</sup> ) |
|----------------------|----------------------------------------------------|---------------|-----------------------------------------------|
| WT(Air)              | 11.93                                              | 23.30         | 0.069                                         |
| WT(Vac)              | 11.75                                              | 12.75         | 0.037                                         |
| WT(NH <sub>3</sub> ) | 42.53                                              | 9.19          | 0.098                                         |

Table S2 Pseudo-second-order kinetics for Cr(VI) removal by WT(NH<sub>3</sub>) and WT(Vac)

| sample                                              | Q <sub>e</sub> (mg g <sup>-1</sup> ) | Pseudo-second-order                  |                                   |                |
|-----------------------------------------------------|--------------------------------------|--------------------------------------|-----------------------------------|----------------|
|                                                     |                                      | q <sub>e</sub> (mg g <sup>-1</sup> ) | k <sub>2</sub> (h <sup>-1</sup> ) | R <sup>2</sup> |
| WT(NH <sub>3</sub> )-H <sub>2</sub> SO <sub>4</sub> | 12.483                               | 15.38                                | 0.0352                            | 0.9851         |
| WT(NH <sub>3</sub> )-HCl                            | 8.9786                               | 9.901                                | 0.1186                            | 0.9967         |
| WT(Vac)-H <sub>2</sub> SO <sub>4</sub>              | 3.5714                               | 3.906                                | 0.1959                            | 0.9705         |
| WT(Vac)-HCl                                         | 3.7299                               | 4.202                                | 0.1666                            | 0.9765         |

Table S3 Adsorption isotherms simulation parameters

| sample                                              | Langmuir                             |                                   |                |
|-----------------------------------------------------|--------------------------------------|-----------------------------------|----------------|
|                                                     | q <sub>e</sub> (mg g <sup>-1</sup> ) | K <sub>L</sub> (h <sup>-1</sup> ) | R <sup>2</sup> |
| WT(NH <sub>3</sub> )-H <sub>2</sub> SO <sub>4</sub> | 25.64                                | 0.039                             | 0.995          |
| WT(NH <sub>3</sub> )-HCl                            | 35.84                                | 0.027                             | 0.993          |

Table S4 Comparison of Cr(VI) removal capacity of various adsorbents.

| Adsorbents                                                                                   | pH  | Time<br>(min) | S <sub>BET</sub><br>(m <sup>2</sup> g <sup>-1</sup> ) | q <sub>max</sub><br>(mg g <sup>-1</sup> ) | ref       |
|----------------------------------------------------------------------------------------------|-----|---------------|-------------------------------------------------------|-------------------------------------------|-----------|
| Magnetic Biochar                                                                             | 1.0 | 300           | 56.2                                                  | 27.2                                      | 1         |
| Magnetic Fe <sub>3</sub> O <sub>4</sub> nanoparticles                                        | 2.0 | 30            | /                                                     | 12.43                                     | 2         |
| Fe <sub>3</sub> O <sub>4</sub> @ SiO <sub>2</sub> nanoparticles                              | 2.0 | 100           | 3.78                                                  | 3.8                                       | 3         |
| N-doped carbon with magnetic particles                                                       | 3.0 | 30            | 1136                                                  | 16                                        | 4         |
| Magnetic carbon particles (MCPs)                                                             | 1.0 | 10            | 32.6                                                  | 15.89                                     | 5         |
| Magnetic carbon fibers (MCFs)                                                                | 1.0 | 10            | 124.7                                                 | 43.18                                     | 5         |
| ZVI @ carbon @ polyaniline nanocomposite                                                     | 1.0 | 5             | 18.52                                                 | 508                                       | 6         |
| Chitosan-coated-magnetite with covalently<br>grafted polystyrene based carbon nanocomposites | 3.0 | 40            | 58                                                    | 8.0                                       | 7         |
| Fluorine and nitrogen co-doped magnetic carbons                                              | 1.0 | 15            | 82.7                                                  | 740.7                                     | 8         |
| Magnetic waste toner                                                                         | 2.0 | 420           | 42.53                                                 | 35.84                                     | This work |

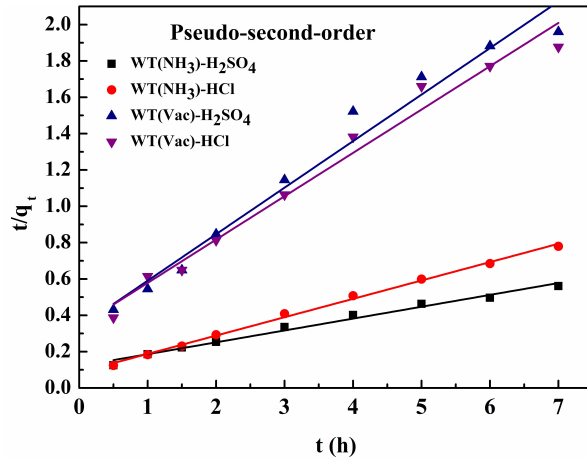

Fig. S1 Kinetics of Cr(VI) adsorption by WT(NH<sub>3</sub>) and WT(Vac) in H<sub>2</sub>SO<sub>4</sub> and HCl system.

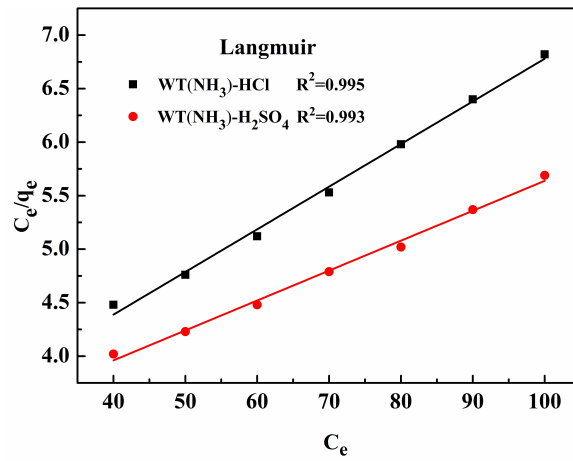

Fig. S2 Linear fitting of adsorption isotherms of WT(NH<sub>3</sub>) in H<sub>2</sub>SO<sub>4</sub> and HCl system.

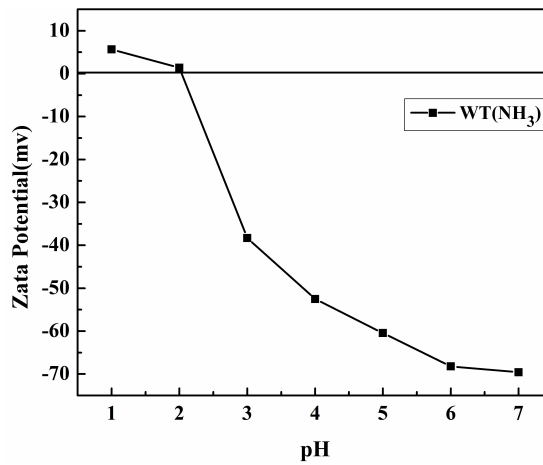

Fig. S3 Effect of pH value on Zeta Potential by WT(NH<sub>3</sub>).

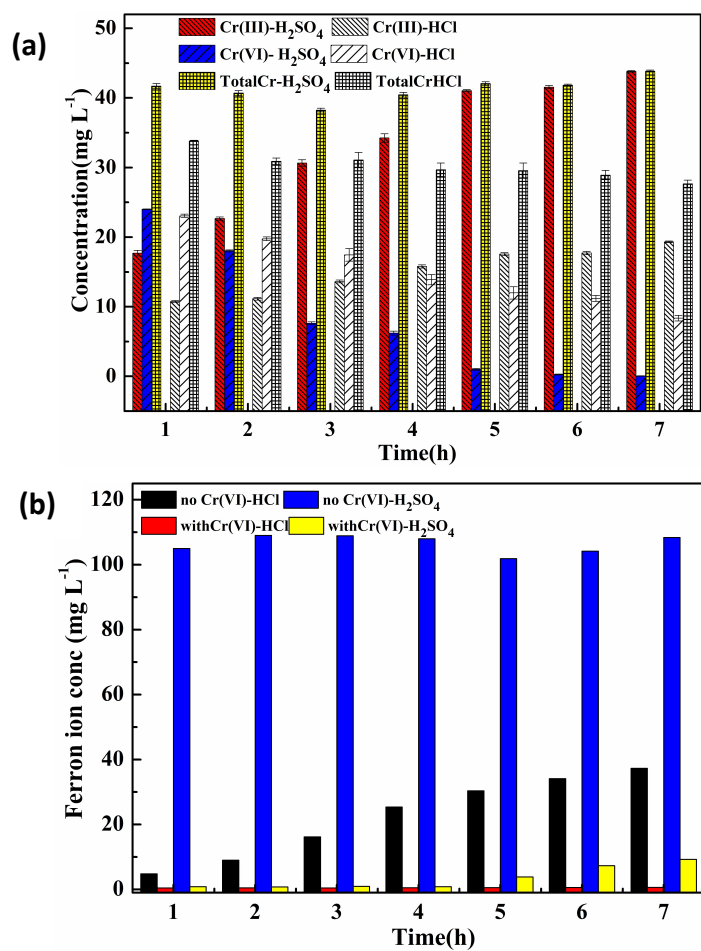

Fig. S4 (a) Concentration of Cr speciation after adsorption by WT(NH<sub>3</sub>) in the solution with different acid system. (b) Concentration of ferrous ion in different acid system with no and with Cr(VI).

## References:

- 1.S. Shi, J. Yang, S. Liang, M. Li, Q. Gan, and K. Xiao, *Sci. Total Environ*, 2018, 628–629, 499-508.
- 2.S. H. Huang and D. H. Chen, *J. Hazard. Mater.*, 2009, 163,174–179.
- 3.Srivastava V, Sharma Y C., *Water Air Soil Pollut.*, 2014, 225, 1-16.
- 4.Y. Li, S. Zhu, Q. Liu, Z. Chen, J. Gu, C. Zhu, T. Lu, D. Zhang and J. Ma, *Water Res.*, 2013, 47, 4188–4197.
- 5.J. N. Huang, Y. H. Cao, Q. Shao, X. F. Peng, and Z. H. Guo, *Ind. Eng. Chem. Res.*, 2017, 56, 10 689–10701.
- 6.K. D. Gong, Q. Hu, Y. Y. Xiao, X. Cheng, H. Liu, N. Wang, B. Qiu, and Z. H. Guo, *J. Mater. Chem. A*, 2018, 6, 11119-11128.
- 7.H. B. Gu, X. J. Xu, H. Y. Zhang, C. B. Liang, H. Lou, C. Ma, Y. J. Li, Z. H. Guo and J. W. Gu. *Eng. Sci.*, 2018, 1, 46-54.
- 8.J. N. Huang, Y. H. Li, Y. H. Cao, F. Peng, Y. G. Cao, Q. Shao, H. Liu, H. Liu, and Z. H. Guo, *J. Mater. Chem. A*, DOI: 10.1039/c8ta02861c.
